# Supplementary material for: Growth Trajectories in Genetic Subtypes of Prader–Willi Syndrome
Source: MDPI journal article supplement (doi:10.3390/genes11070736), 2020-07-02
Supplement: s1 [file s1]

## Supplementary data

**Table S1.** Comparison of the Akaike information criterion and Bayesian information criterion for a LMM (random slope only), a LMM (random slope and random intercept) and a LMM with AR(1) correlation structure when fitting growth models for height for the female deletion subgroup.

| Gender | Fitted Model               | Deletion subgroup, Outcome: Height |        |                  |        |                |        |
|--------|----------------------------|------------------------------------|--------|------------------|--------|----------------|--------|
|        |                            | 4 knots (2,5,10,15)                |        | 3 knots (2,7,15) |        | 2 knots (5,10) |        |
|        |                            | AIC                                | BIC    | AIC              | BIC    | AIC            | BIC    |
| Female | Random slope only          | 4876.0                             | 4914.5 | 4888.2           | 4921.9 | 5112.5         | 5145.4 |
|        | Random slope and intercept | 4488.5                             | 4536.6 | 4513.8           | 4557.1 | 4882.9         | 4921.4 |
|        | Random effects + AR(1)     | 3746.3                             | 3799.2 | 3747.9           | 3796.1 | 3918.8         | 3962.1 |

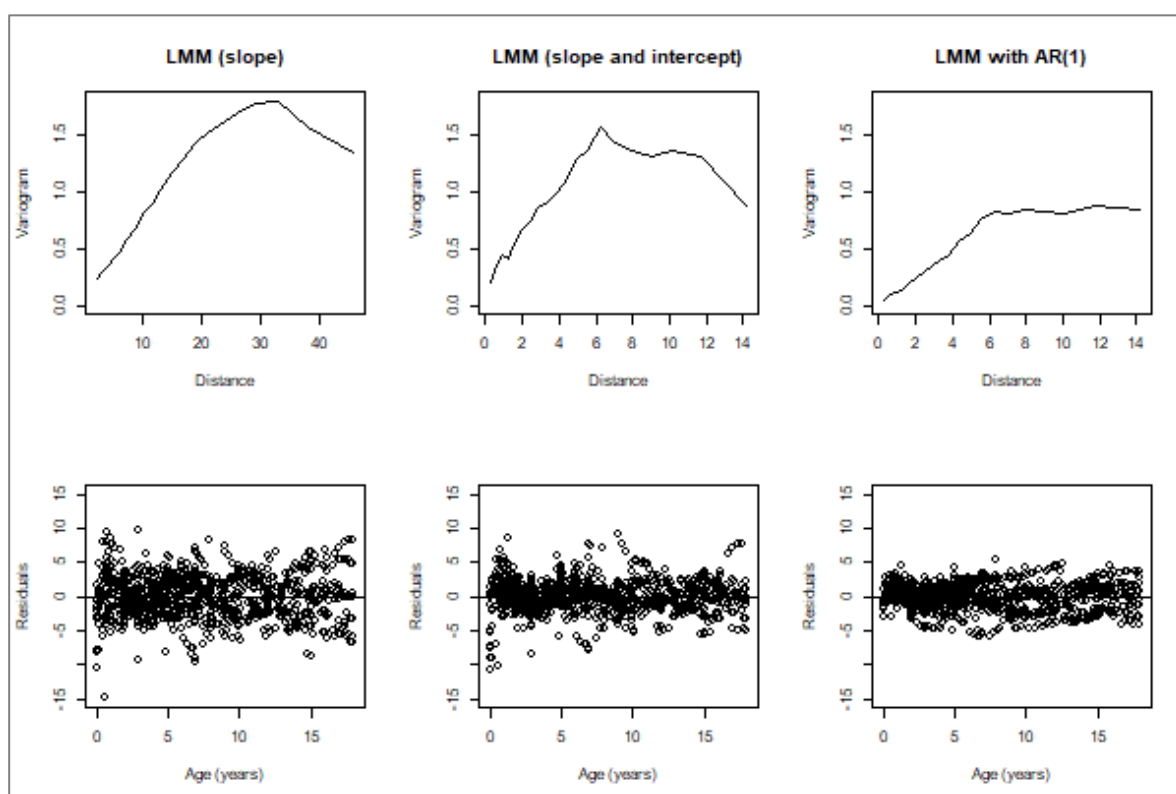

**Figure S1.** Comparison of the variograms and residual plots for a LMM (random slope only), a LMM (random slope and random intercept) and a LMM with AR(1) correlation structure when fitting growth models (with 4 knots) for height for the female deletion subgroup.

**Table S2.** Mean difference in rate of growth across age intervals between individuals with the deletion and non-deletion mechanism of PWS, estimated using linear mixed models with linear splines (adjusted for year of birth), with an interaction term between age and genetic subtype.

| Outcome                         | Age (years) | Average difference in mean rate of growth ( <i>Deletion – Non-deletion</i> ) |                 |                |                 |                 |                |
|---------------------------------|-------------|------------------------------------------------------------------------------|-----------------|----------------|-----------------|-----------------|----------------|
|                                 |             | Females                                                                      |                 |                | Males           |                 |                |
|                                 |             | <i>Estimate</i>                                                              | <i>[95% CI]</i> | <i>P-value</i> | <i>Estimate</i> | <i>[95% CI]</i> | <i>P-value</i> |
| Height (cm/year)                | <2          | 0.11                                                                         | [-1.09, 1.30]   | 0.86           | 1.31            | [-0.24, 2.87]   | 0.10           |
|                                 | 2-5         | 0.40                                                                         | [-1.20, 2.01]   | 0.62           | -1.27           | [-3.11, 0.58]   | 0.18           |
|                                 | 5-10        | 0.15                                                                         | [-0.92, 1.21]   | 0.79           | -1.37           | [-2.50, -0.24]  | 0.02           |
|                                 | 10-15       | -0.81                                                                        | [-1.82, 0.20]   | 0.11           | 2.80            | [1.68, 3.92]    | 0.01           |
|                                 | >15         | 1.04                                                                         | [-0.81, 2.89]   | 0.27           | 1.90            | [-0.20, 4.01]   | 0.08           |
| Weight (kg/year)                | <2          | 0.73                                                                         | [-0.71, 2.17]   | 0.32           | -0.18           | [-2.61, 2.25]   | 0.89           |
|                                 | 2-5         | -0.40                                                                        | [-2.18, 1.39]   | 0.66           | 0.24            | [-2.03, 2.51]   | 0.84           |
|                                 | 5-10        | 1.07                                                                         | [-0.10, 2.24]   | 0.07           | -0.23           | [-1.67, 1.21]   | 0.76           |
|                                 | 10-15       | -1.59                                                                        | [-2.69, -0.48]  | 0.01           | 3.71            | [2.30, 5.12]    | <0.01          |
|                                 | >15         | -1.83                                                                        | [-3.86, 0.21]   | 0.08           | 1.30            | [-1.36, 3.96]   | 0.34           |
| BMI ((kg/m <sup>2</sup> )/year) | <2          | 1.36                                                                         | [0.57, 2.15]    | <0.01          | 1.04            | [-0.14, 2.22]   | 0.08           |
|                                 | 2-5         | -1.07                                                                        | [-2.09, -0.05]  | 0.04           | -0.57           | [-1.85, 0.70]   | 0.38           |
|                                 | 5-10        | -0.09                                                                        | [-0.76, 0.57]   | 0.78           | -0.40           | [-1.20, 0.40]   | 0.33           |
|                                 | 10-15       | -0.38                                                                        | [-1.00, 0.24]   | 0.23           | 0.43            | [-0.36, 1.21]   | 0.29           |
|                                 | >15         | -0.93                                                                        | [-2.10, 0.23]   | 0.12           | 0.16            | [-1.31, 1.63]   | 0.83           |
